# Supplementary material for: Manganese Mediates its Antiviral Functions in a cGAS-STING Pathway Independent Manner
Source: Preprints.org preprint supplement (doi:10.20944/preprints202302.0099.v1), 2023-02-06
Supplement: Supplementary file 1 [file supplementary]

**Supplementary Table 1. Primers used for RT-qPCR in this study**

| **Names** | **Sequences (5’-3’)** |
| --- | --- |
| H-IFNβ-F | TGGGAGGATTCTGCATTACC |
| H-IFNβ-R | CAGCATCTGCTGGTTGAAGA |
| H-ISG60-F | AGTCTAGTCACTTGGGGAAAC |
| H-ISG60-R | ATAAATCTGAGCATCTGAGAGTC |
| H-RPL32-F | CAACATTGGTTATGGAAGCAACA |
| H-RPL32-R | TGACGTTGTGGACCAGGAACT |
| P-IFNβ-F | TGAGCATTCTGCAGTACCTGA |
| P-IFNβ-R | CCGGAGGTAATCTGTAAGTCTGT |
| P-ISG15-F | ATCCTGGTGAGGAACGACAA |
| P-ISG15-R | GAAAGTCAGCCAGAACTGGTC |
| P-β-actin-F | ATGAAGATCAAGATCATCGCG |
| P-β-actin-R | TCGTACTCCTGCTTGCTGATC |

**Supplementary Table 2. CRISPR gRNA encoding DNA sequences and PCR primers for monkey and porcine monkey cGAS genes**

| **Names** | **Sequences (5’-3’)** |
| --- | --- |
| M-cGAS gRNA1-F | CACCGGCCTCGGAAGCTCTCCGCG |
| M-cGAS gRNA1-R | AAACCGCGGAGAGCTTCCGAGGCC |
| M-cGAS gRNA2-F | CACCGTCGCCCGTCCGCGCAACTG |
| M-cGAS gRNA2-R | AAACCAGTTGCGCGGACGGGCGAC |
| M-cGAS detection primer-F | GCTGGCTCTTCCTCTTGCG |
| M-cGAS detection primer-R | GAAACAGCCGGTTCCCGAG |
| P-cGAS gRNA1-F | CACCGAGAAGCCGCAGGTACGCACG |
| P-cGAS gRNA1-R | AAACCGTGCGTACCTGCGGCTTCTC |
| P-cGAS gRNA2-F | CACCGGAGGCTCTACCCTTTCGGA |
| P-cGAS gRNA2-R | AAACTCCGAAAGGGTAGAGCCTCC |
| P-cGAS detection primer-F | AGTGTAAATGGCGCTCCAAC |
| P-cGAS detection primer-R | CAAGATCCAGCCCTGAGAAG |
